# Supplementary material
Source: Springer Nature journal article supplement (https://www.springermedizin.de/resource/supplementary/13045_2013_444_MOESM3_ESM.pdf/9661226)

Patients with complete response

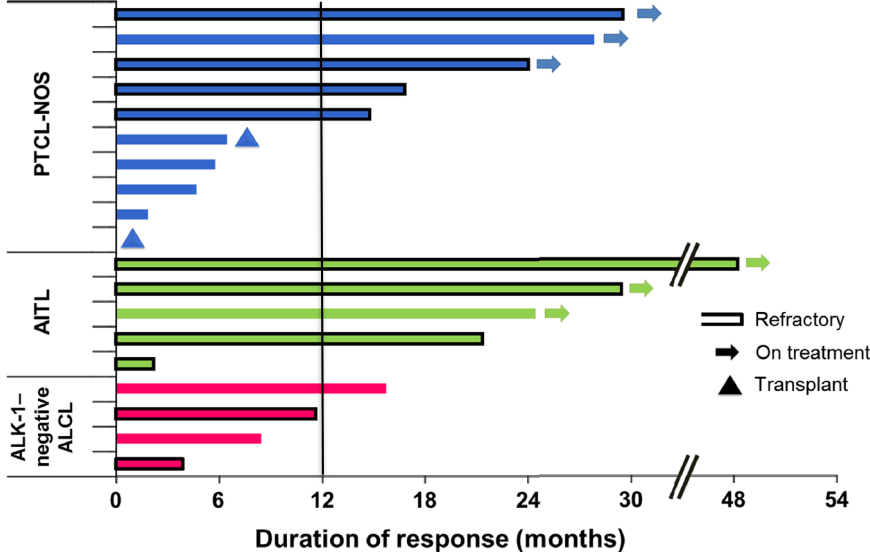

Supplement: MOESM3 [file 9661226]
